# Supplementary material
Source: publisher figshare collection journal article supplement (https://acs.figshare.com/ndownloader/files/22299969)
Supplement: Supplementary file 1 [file 22299969]

## Electronic Supplemental Information

### **Tetraphenylethylene(TPE)-containing metal-organic nanobelt and its turn-on fluorescence for Sulfide (S<sup>2-</sup>)**

*Kaixiu Li,<sup>†,#</sup> Zhengguang Li,<sup>†,#</sup> Die Liu,<sup>\*,‡</sup> Mingzhao Chen,<sup>‡</sup> Shi-Cheng Wang,<sup>§</sup> Yi-Tsu*

*Chan<sup>§</sup> and Pingshan Wang<sup>\*,†,‡</sup>*

<sup>†</sup>Department of Organic and Polymer Chemistry; Hunan Key Laboratory of Micro & Nano  
Materials Interface Science, College of Chemistry and Chemical Engineering; Central South  
University, Changsha, Hunan 410083, China

E-mail: chem-ld@gzhu.edu.cn (D. Liu). chemwps@csu.edu.cn (P. Wang).

<sup>‡</sup>Institute of Environmental Research at Greater Bay Area; Key Laboratory for Water Quality and  
Conservation of the Pearl River Delta, Ministry of Education; Guangzhou Key Laboratory for  
Clean Energy and Materials; Guangzhou University, Guangzhou 510006, China

<sup>§</sup>Department of Chemistry, National Taiwan University, Number 1, Section 4, Roosevelt Road,  
Taipei 10617, Taiwan

### Table of Contents

|                                                                       |     |
|-----------------------------------------------------------------------|-----|
| 1. General Procedures .....                                           | S2  |
| 2. Synthesis and discussion of the related ligands and complexes..... | S2  |
| 3. UV-vis and fluorescence spectra.....                               | S11 |
| 4. Reference .....                                                    | S19 |

## 1. General Procedures

**NMR spectra.** NMR spectra were recorded on a Bruker ADVANCE 400 or 500 NMR Spectrometer. <sup>1</sup>H NMR chemical shifts are reported in ppm downfield from tetramethylsilane (TMS) reference using the residual protonated solvent as an internal standard.

**Mass spectra.** Mass spectra of complexes and ligands were determined on Waters Synapt G2 Mass Spectrometer under the following conditions: ESI capillary voltage, 3.5 kV; cone voltage, 35 V; desolvation gas flow, 800 L/h. All chemicals were purchased from commercial suppliers and used without further purification unless otherwise specified.

**Collision Cross-Sections Calibration.** The calibration curve was established according to the protocol listed in the literature using published collision cross-sections S3 of polyalanine, cytochrome c (bovine), reserpine, lysozyme, and insulin (human).<sup>S1</sup> A plot of corrected drift times versus corrected cross-sections of calibrants fitted with power functions was used as a calibration curve for cross-section measurements.

**UV-vis and emission spectral analysis.** Absorption spectra were measured with Hitachi (model U-3010) UV-Vis spectrophotometer in a 1-cm quartz cell. Emission spectra were measured with Hitachi (F-7000) fluorescence spectrophotometer in a 1-cm quartz cell under the following conditions: EX Slit, 5.0 nm; EM Slit, 5.0 nm; PMT Voltage, 500 V for complex and EX Slit, 5.0 nm; EM Slit, 2.5 nm; PMT Voltage, 500 V for ligand.

**Dynamic light scattering (DLS) experiments.** Dynamic light scattering (DLS) was carried out on a Nano-ZS90 instrument at room temperature.

## 2. Synthesis and discussion of the related ligands and complexes

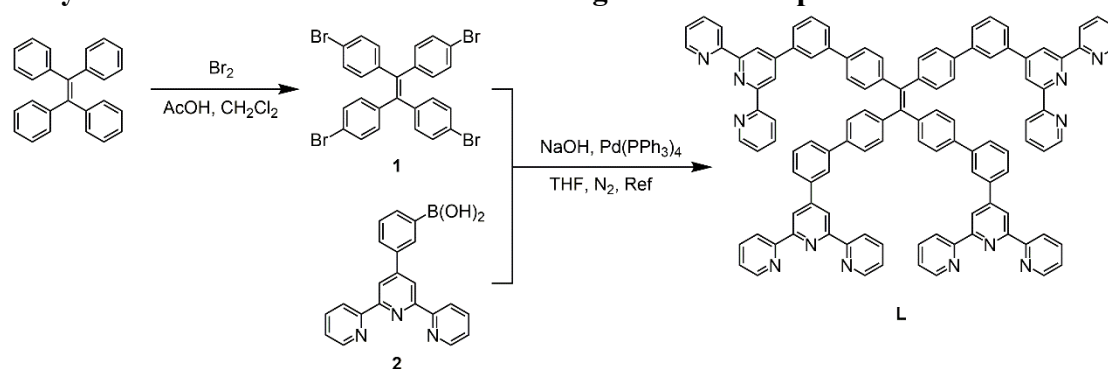

Scheme S1. Synthetic Route of ligand **L**.

Synthesis of compound **1**<sup>S2</sup>: Bromine (4 mL, 80 mmol) was added over a 5 min period to a solution of tetraphenylethylene (3.32 g, 10 mmol) in 30 mL of glacial acetic acid at 0 °C. After further adding dichloromethane (40 mL), the resulting mixture was heated at 50 °C for about 30 min [based on thin layer chromatography (TLC) detection]. The reaction mixture was added to 150 mL ice water, and the precipitated solid was filtered and washed repeatedly with water and ethanol and give compound **1** (5.90 g, 9.1 mmol) as a white solid in 91% yield. <sup>1</sup>H NMR (400 MHz, 298 K,  $\text{CDCl}_3$ , ppm)  $\delta$  = 7.26 (d,  $J$  = 8.4 Hz, 8H), 6.84 (d,  $J$  = 8.4 Hz, 8H);

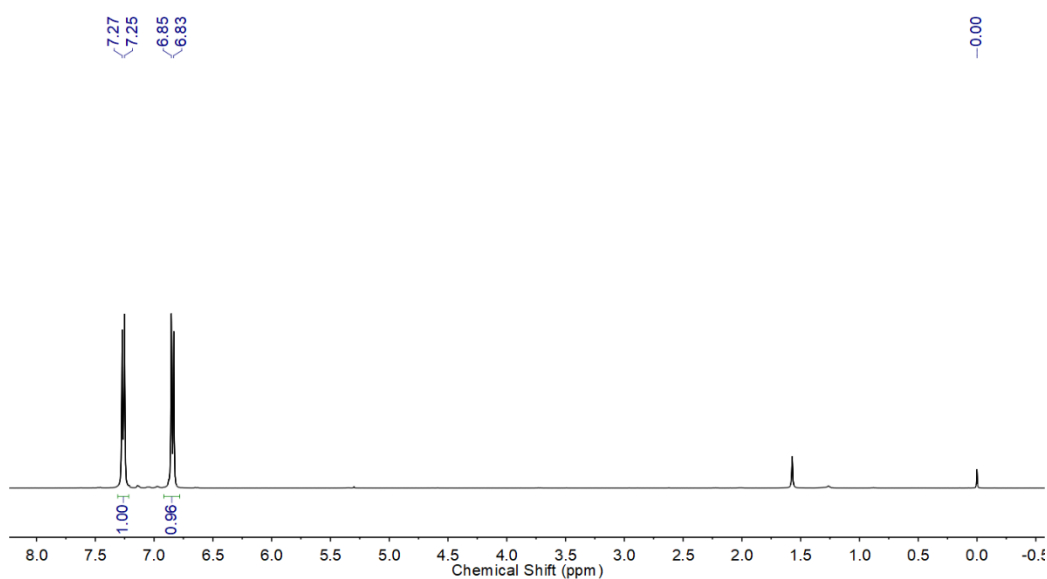

Figure S1.  $^1\text{H}$  NMR spectrum of compound **1** in  $\text{CDCl}_3$ .

Synthesis of compound **L**: To a mixture of **1** (324 mg, 0.5 mmol) and 4'-(3-boronatophenyl) [2,2':6',2''] terpyridine (882 mg, 2.5 mmol) in THF (150 mL), aqueous NaOH (200 mg, 5 mmol, 1 M) was added. The system was pumped and backfilled with nitrogen; then  $\text{Pd}(\text{PPh}_3)_4$  (142 mg, 0.12 mmol) was added. After refluxing for 48 h under nitrogen, the mixture was cooled to 25 °C and evaporated under reduced pressure. The residue was purified by flash column chromatography ( $\text{Al}_2\text{O}_3$ ) eluting with  $\text{CH}_2\text{Cl}_2/\text{CH}_3\text{OH}$  ether and recrystallization with  $\text{CH}_2\text{Cl}_2/\text{CH}_3\text{OH}$  to give **L** (500 mg, 0.32 mmol) as a white solid in 64 yield;  $^1\text{H}$  NMR (400 MHz, 298 K,  $\text{CDCl}_3$ , ppm):  $\delta$  = 8.75 (s, 8H), 8.70-8.61 (m, 16H), 8.11 (s, 4H), 7.85 (td,  $J$  = 7.8, 1.8 Hz, 12H), 7.69 (d,  $J$  = 8.0 Hz, 4H), 7.58-7.50 (m, 12H), 7.33-7.29 (m, 16H);  $^{13}\text{C}$  NMR (101 MHz, 298 K,  $\text{CDCl}_3$ , ppm):  $\delta$  = 156.25, 155.93, 150.42, 149.12, 143.23, 141.66, 140.55, 139.01, 138.85, 136.84, 132.10, 129.29, 127.79, 126.83, 126.20, 126.00, 123.80, 121.37, 119.05; ESI-MS: calcd. for  $\text{C}_{110}\text{H}_{72}\text{N}_{12}$ .  $[\text{M}+2\text{H}]^{2+}$ :  $m/z$  = 781.809; found: 781.816.

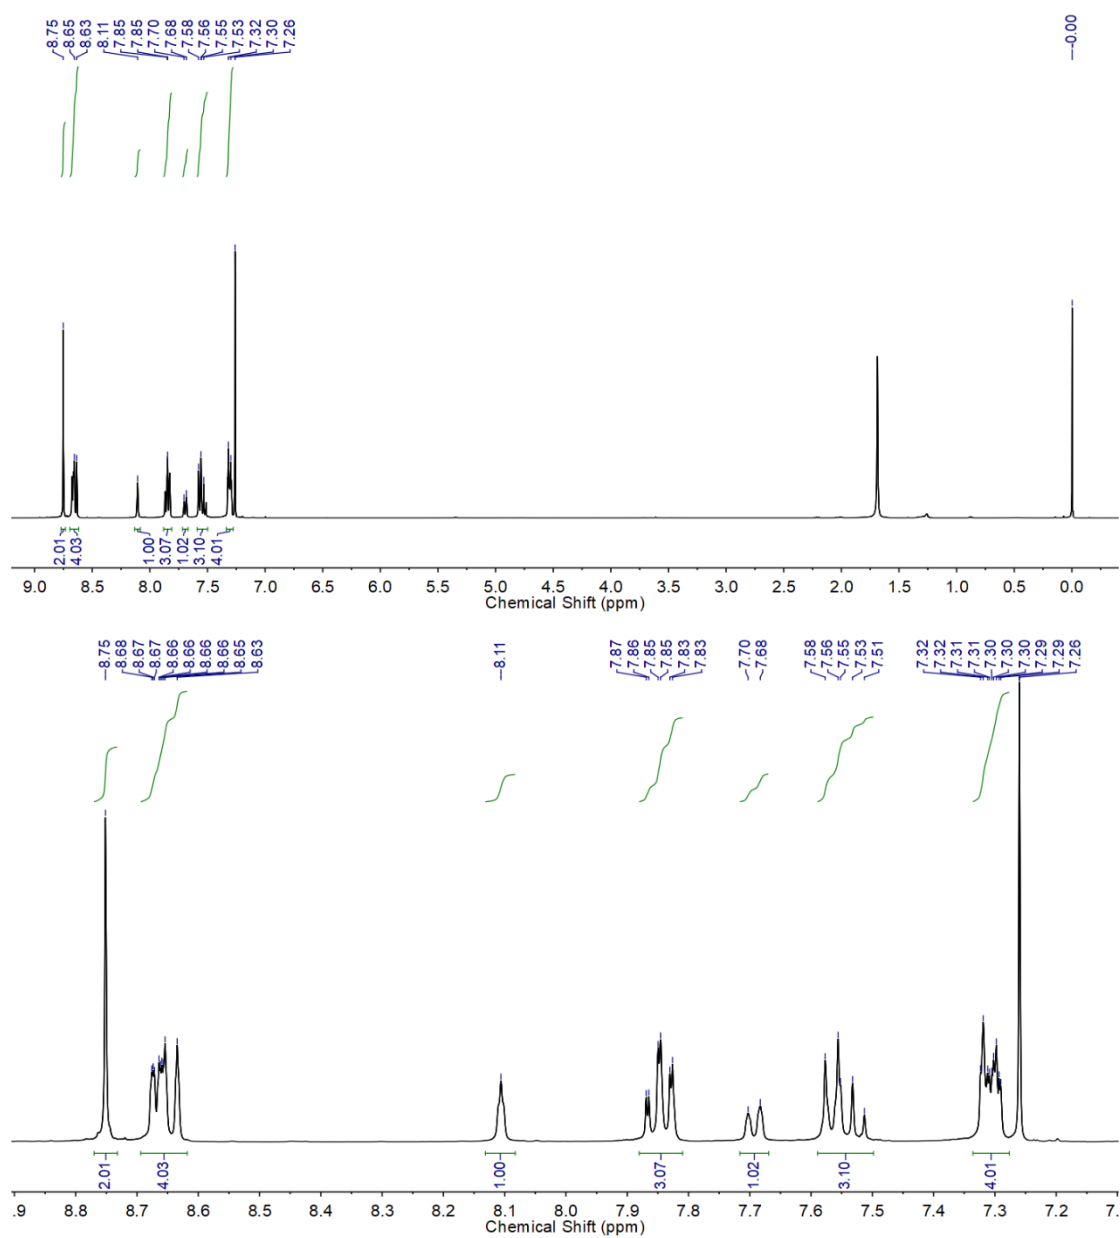

Figure S2.  $^1\text{H}$  NMR spectrum of ligand **L** in  $\text{CDCl}_3$ .

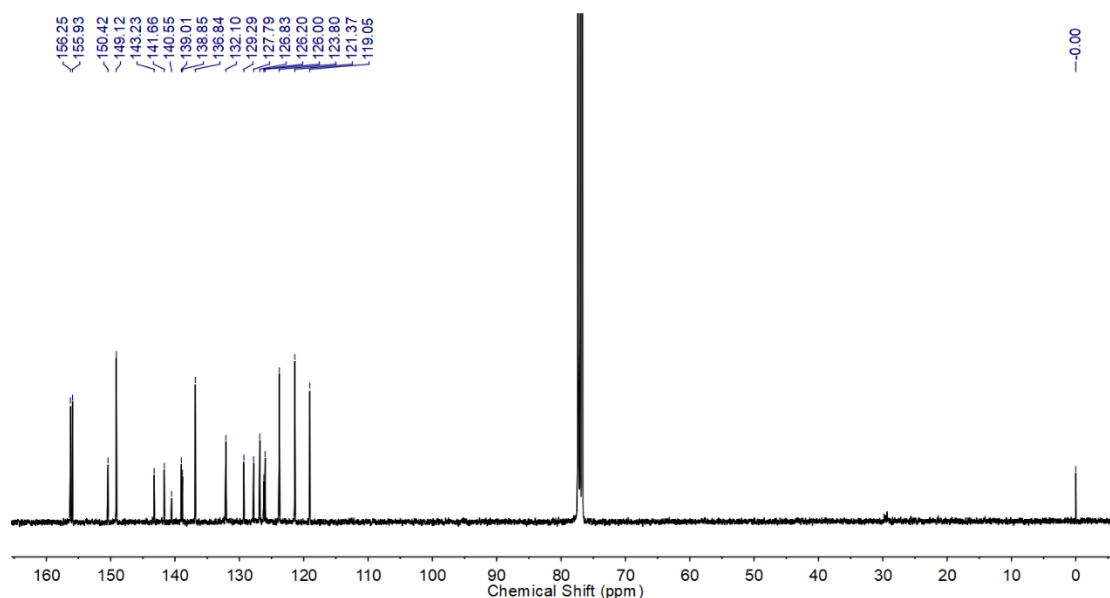

Figure S3.  $^{13}\text{C}$  NMR spectrum of ligand **L** in  $\text{CDCl}_3$ .

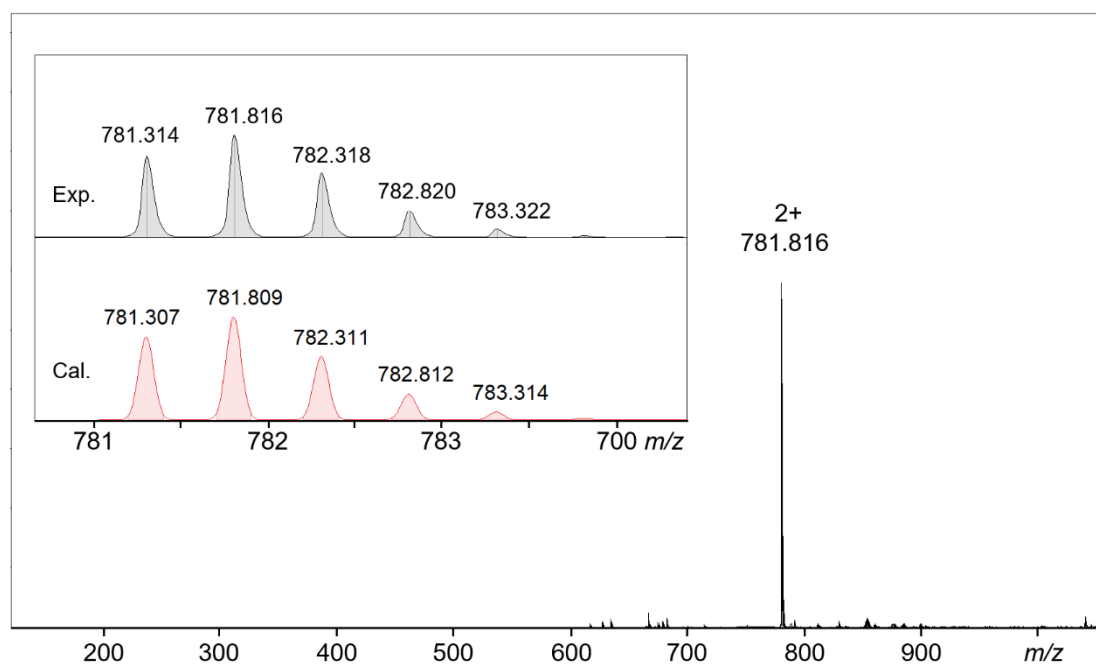

Figure S4. ESI-MS spectrum and experimental and calculated isotope patterns of ligand **L**.

Synthesis of complex **S**: To a mixed solvent of  $\text{CHCl}_3$  (20 mL) and  $\text{CH}_3\text{OH}$  (15 mL) of ligand **L** (23.5 mg, 15.0  $\mu\text{mol}$ ), a solution of  $\text{Cd}(\text{NO}_3)_2 \cdot 4\text{H}_2\text{O}$  (9.3 mg, 30.1  $\mu\text{mol}$ ) in  $\text{CH}_3\text{OH}$  (5.0 mL) was added. After being stirred at 65  $^\circ\text{C}$  for 12 h, excess  $\text{NH}_4\text{PF}_6$  was added into the solution to precipitate the complex, which was filtered, washed with  $\text{CH}_3\text{OH}$ , and then dried *in vacuo*. The complex **S** was obtained as the pale-yellow solid in 93% yield (33.0 mg, 4.7  $\mu\text{mol}$ ).  $^1\text{H}$  NMR (400 MHz, 298 K,  $\text{CD}_3\text{CN}$ , ppm):  $\delta$  = 8.92 (s, 24H), 8.66 (d,  $J$  = 8.4 Hz, 24H), 8.32 (s, 12H), 8.05 (d,  $J$  = 7.6 Hz, 12H), 8.00–7.95 (m, 60H), 7.79 (dd,  $J$  = 12.2, 5.7 Hz, 36H), 7.44 (d,  $J$  = 8.3 Hz, 12H), 7.25–7.15 (m, 24H);  $^{13}\text{C}$  NMR (126 MHz, 298 K,  $\text{CD}_3\text{CN}$ , ppm)  $\delta$  = 155.58, 153.44, 150.03, 149.53, 148.66, 143.24, 141.28,

141.15, 141.05, 137.94, 137.42, 131.54, 130.23, 128.77, 127.06, 126.55, 126.25, 123.74, 122.36; ESI-MS ( $m/z$ ): 1275.00  $[M-5PF_6]^{5+}$  (calcd.  $m/z$  = 1275.00), 1038.33  $[M-6PF_6]^{6+}$  (calcd.  $m/z$  = 1038.34), 869.30  $[M-7PF_6]^{7+}$  (calcd.  $m/z$  = 869.30), 742.51  $[M-8PF_6]^{8+}$  (calcd.  $m/z$  = 742.51), 643.80  $[M-9PF_6]^{9+}$  (calcd.  $m/z$  = 643.79), 565.02  $[M-10PF_6]^{10+}$  (calcd.  $m/z$  = 565.02).

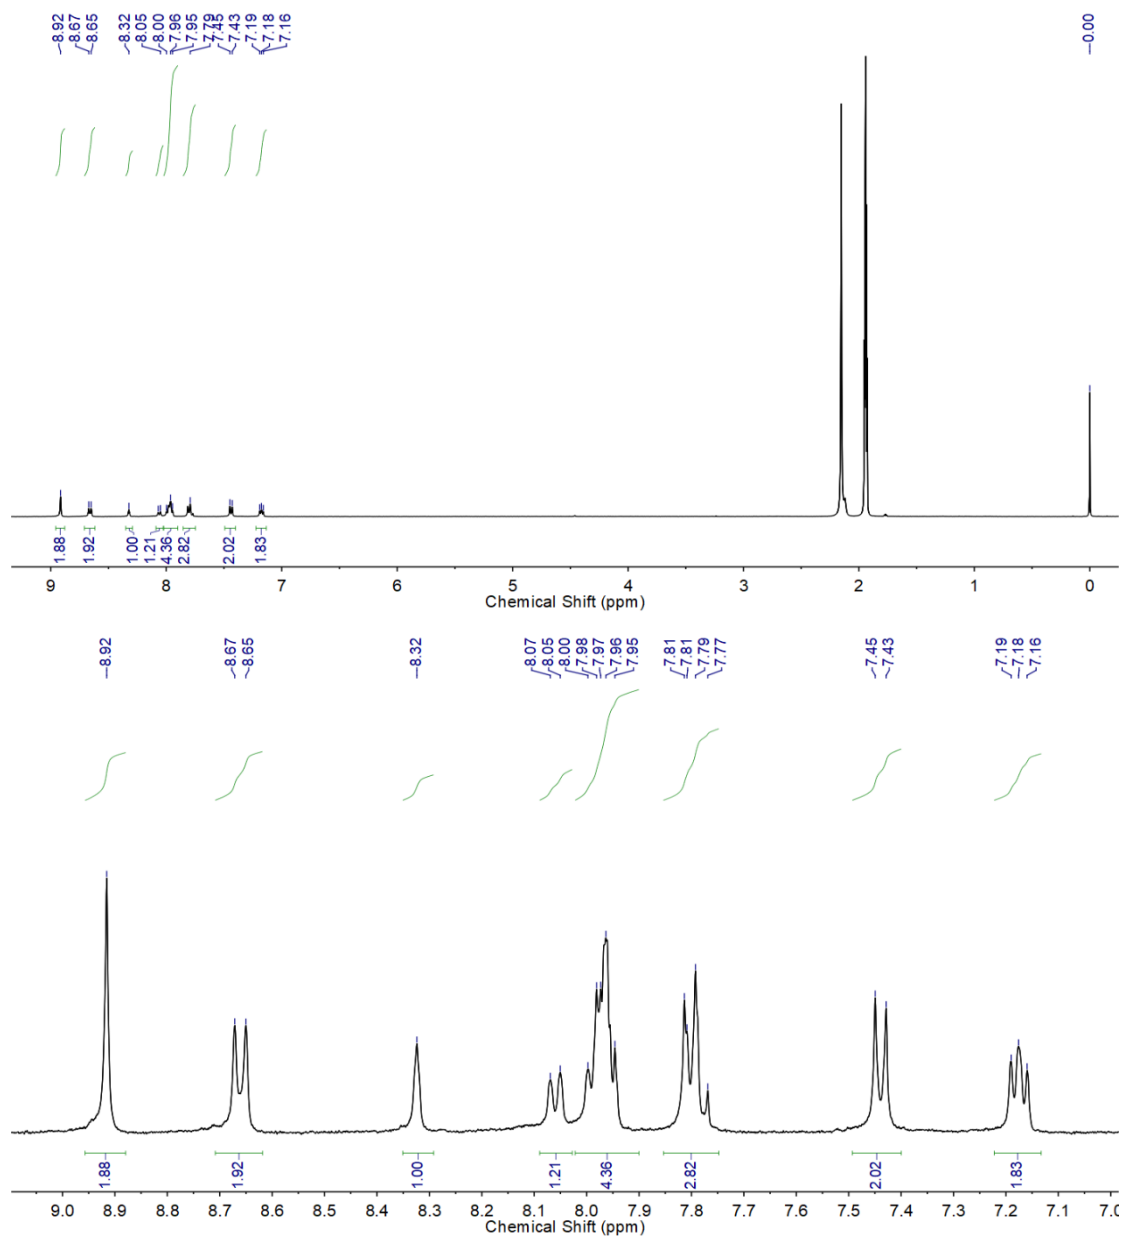

Figure S5.  $^1H$  NMR spectrum of complex **S** in  $CD_3CN$ .

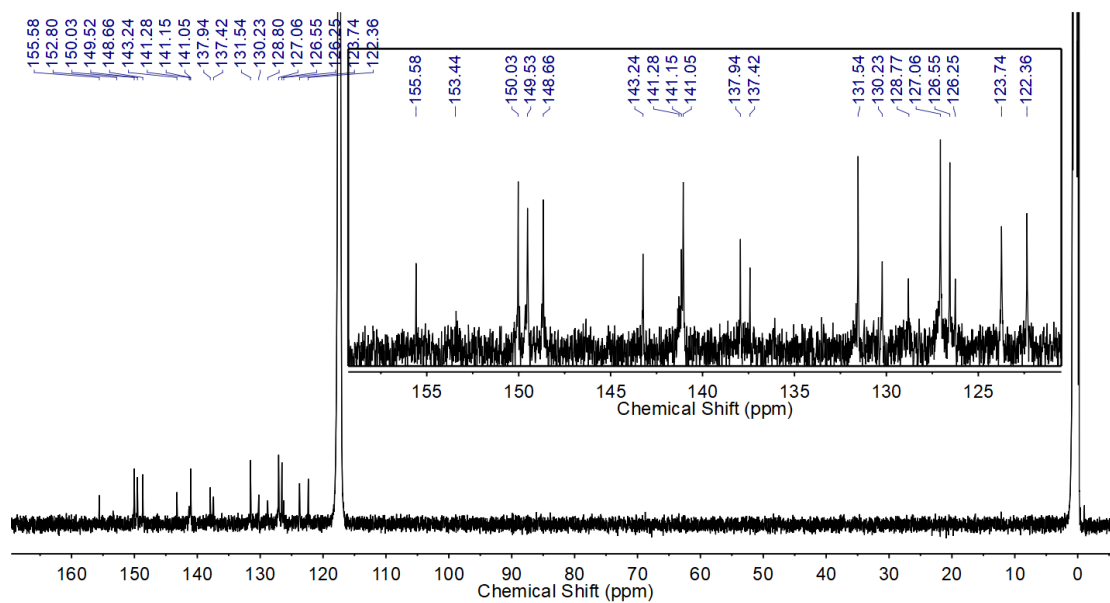

Figure S6.  $^{13}\text{C}$  NMR spectrum of complex **S** in  $\text{CD}_3\text{CN}$ .

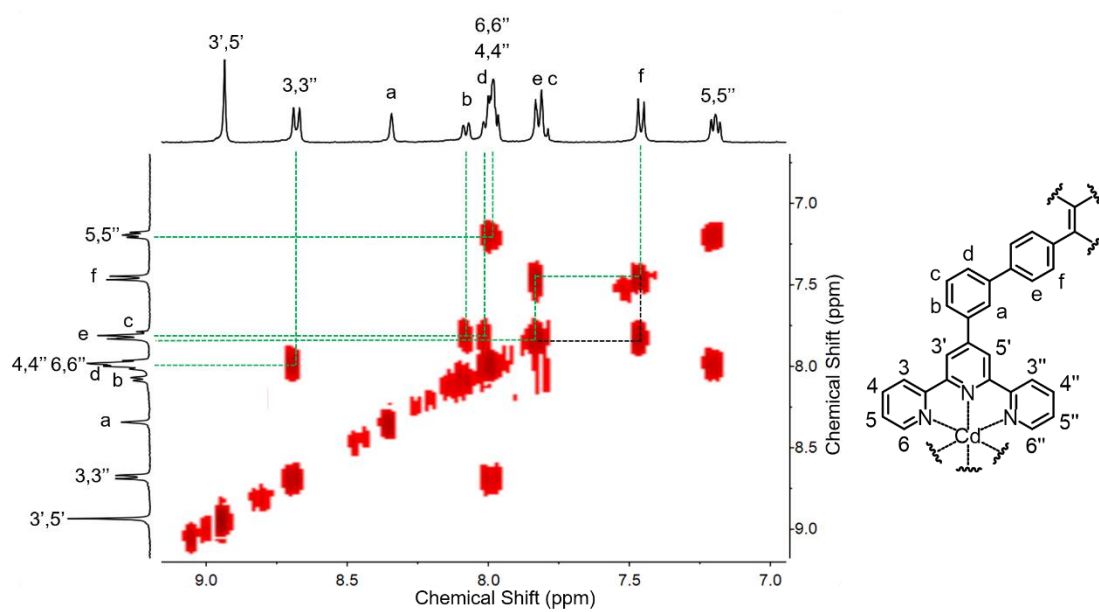

Figure S7. COSY spectrum of complex **S** in  $\text{CD}_3\text{CN}$ .

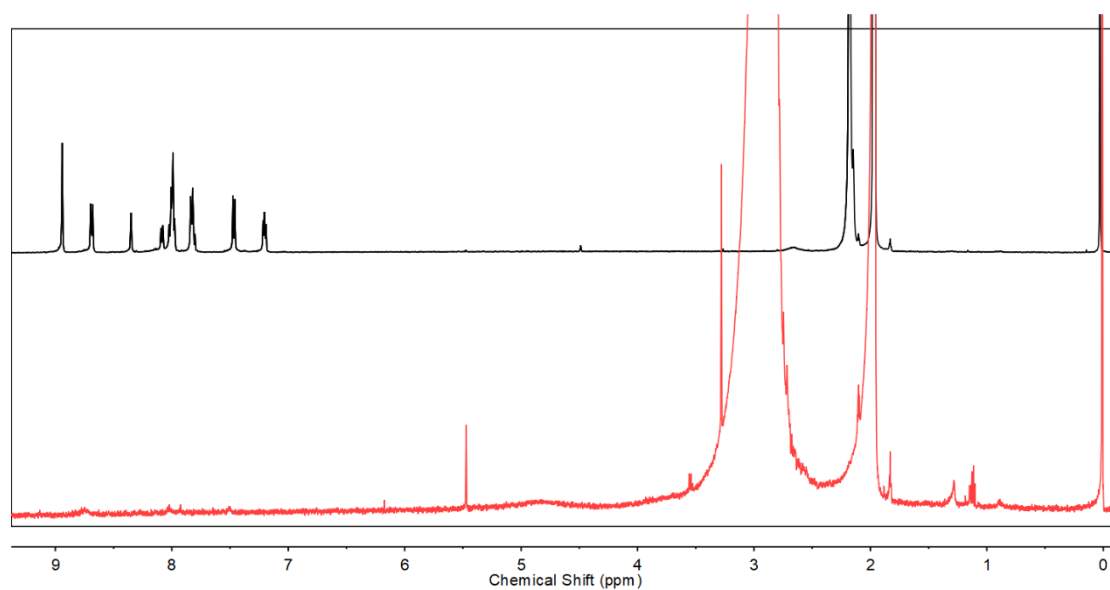

Figure S8. <sup>1</sup>H NMR spectra of complex **S** in CD<sub>3</sub>CN (upper) and after 10 min upon the addition of 1 μmol Na<sub>2</sub>S (down).

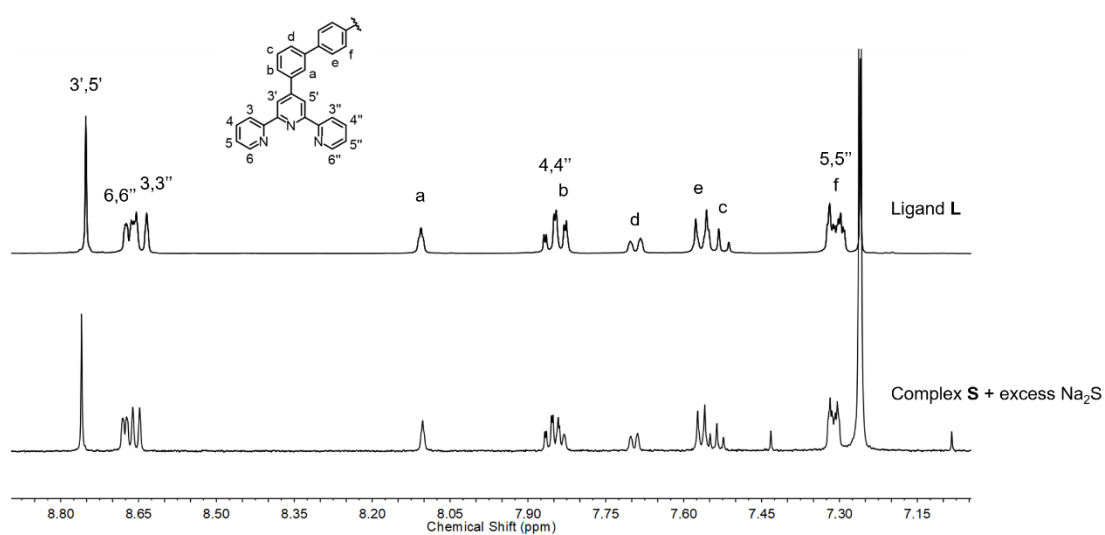

Figure S9. <sup>1</sup>H NMR spectra of ligand **L** in CDCl<sub>3</sub> (upper) and resultant solid products which were formed from complex **S** after 10 min upon the addition of 2 μmol Na<sub>2</sub>S in CH<sub>3</sub>CN/H<sub>2</sub>O (down).

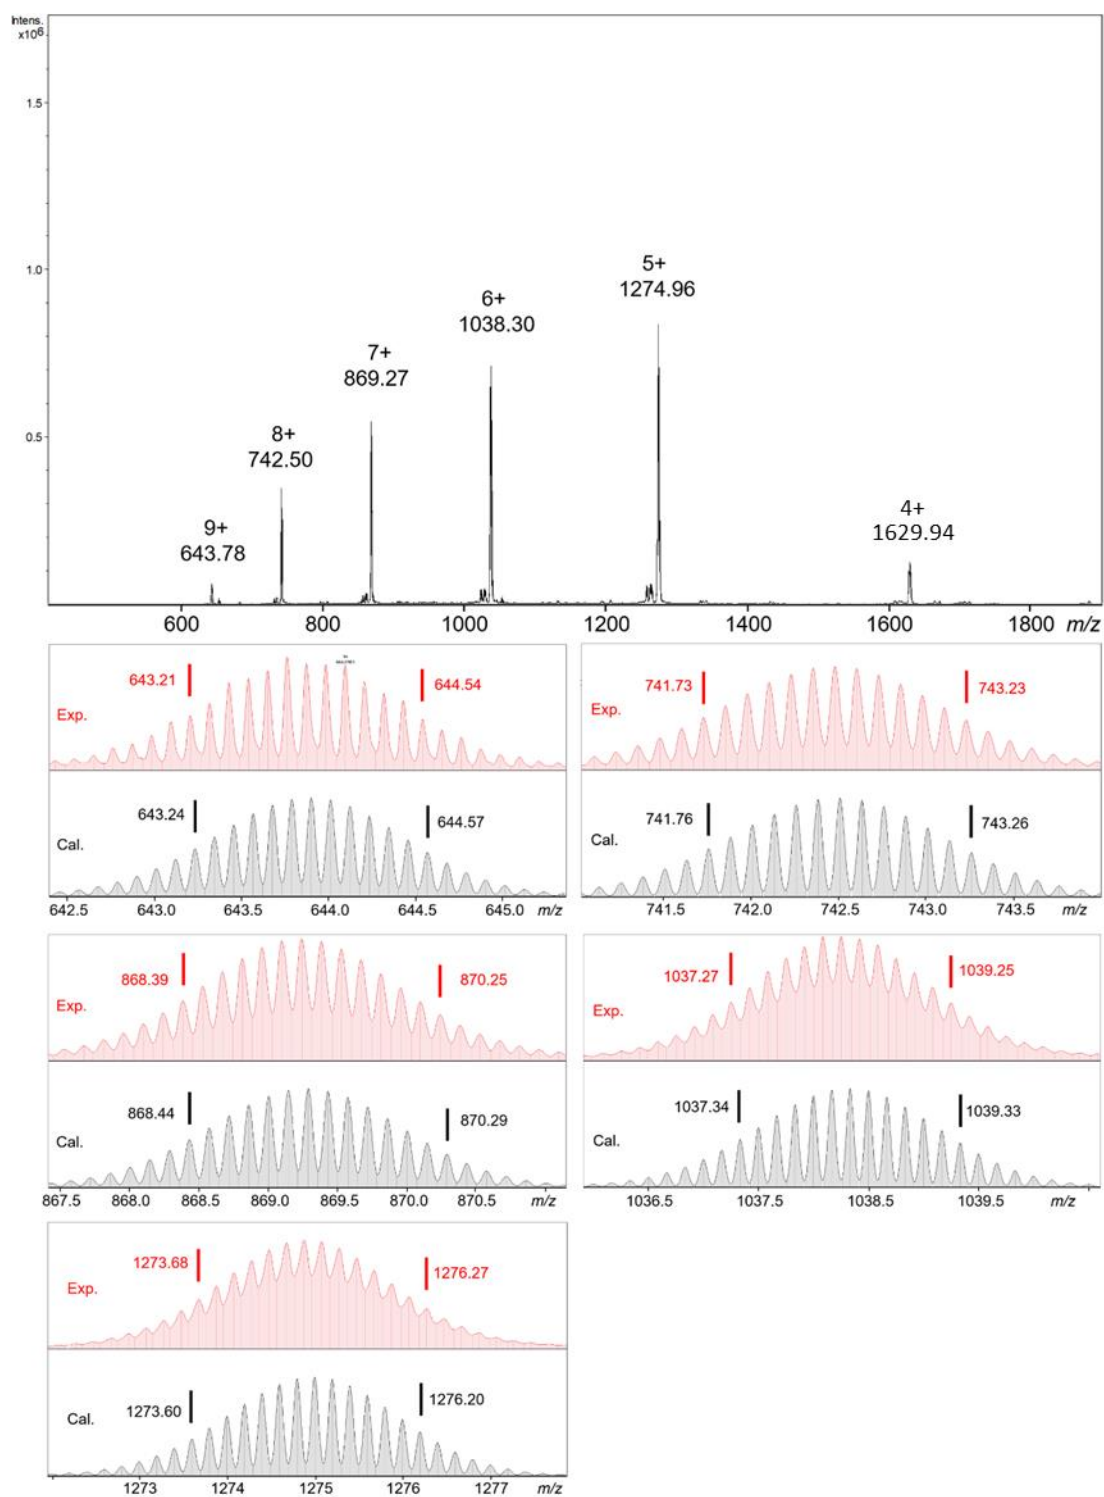

Figure S10. ESI-MS spectrum and experimental and calculated isotope patterns for the different charge states (5+ to 9+) of complex **S**.

Table S1. Experimental and calculated collision cross-sections of **S**.

| Charge State | m/z       | Exp. CCS(A <sup>2</sup> ) | Average CCS(A <sup>2</sup> ) | Calcd. Average CCS(A <sup>2</sup> ) |
|--------------|-----------|---------------------------|------------------------------|-------------------------------------|
| 6+           | 1038.1917 | 838.7904                  |                              |                                     |
| 7+           | 869.3006  | 812.8956                  |                              |                                     |
| 8+           | 742.3955  | 803.1344                  | 808.9695 ± 20.2863           | 770.2948 ± 2.1663 <sup>[a]</sup>    |
| 9+           | 643.7997  | 782.4071                  |                              | 890.9943 ± 12.558 <sup>[b]</sup>    |
| 10+          | 565.0234  | 807.6197                  |                              |                                     |

The calculated values were obtained by [a] projection approximation (PA) and [b] trajectory method (TM) using MOBCAL

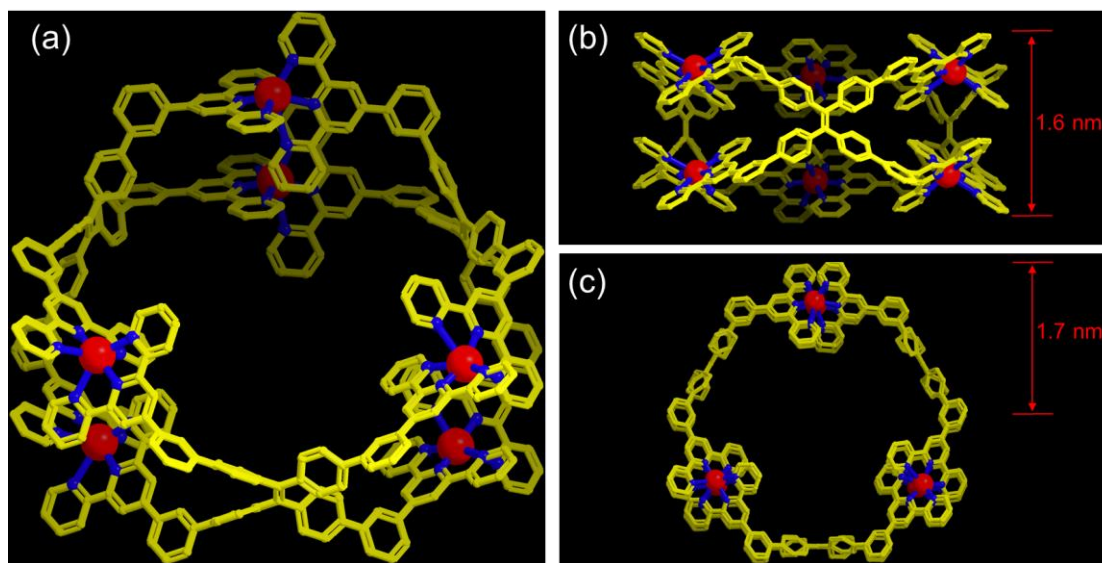

Figure S11. The energy-minimized structure (a) at the side sight (b) and at the top sight (c) from molecular modeling of complex **S**, the radius of nanobelt structure **S** was calculated to be 1.9 nm.

### 3. UV-vis and fluorescence spectra

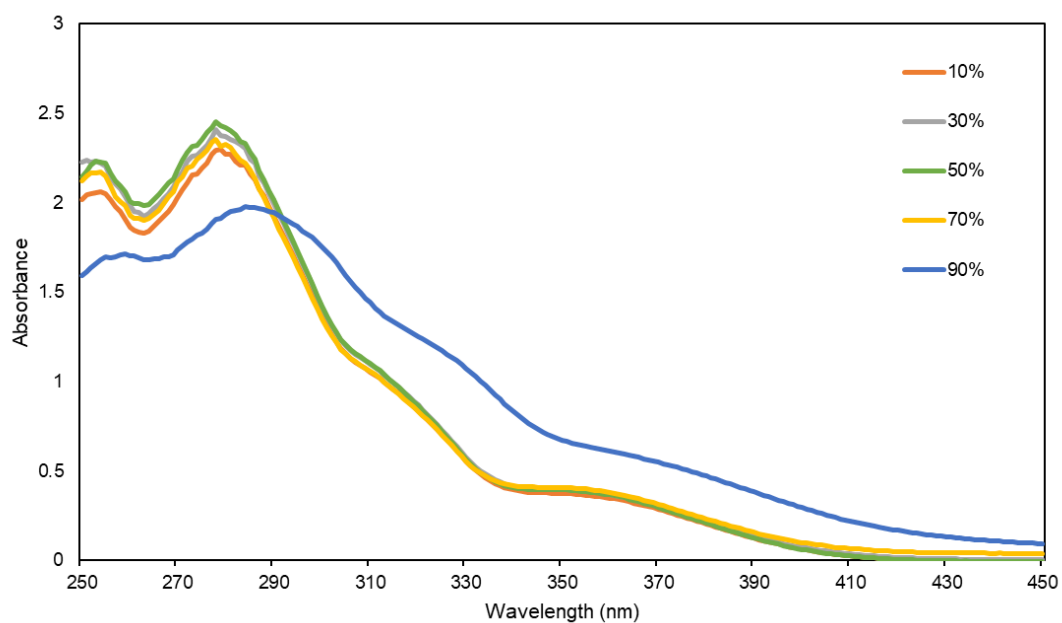

Figure S12. UV-vis spectra of ligand **L** in  $\text{CHCl}_3$  with various hexane fractions at 298K ( $c = 1.6 \times 10^{-5}$  M, 2 mL).

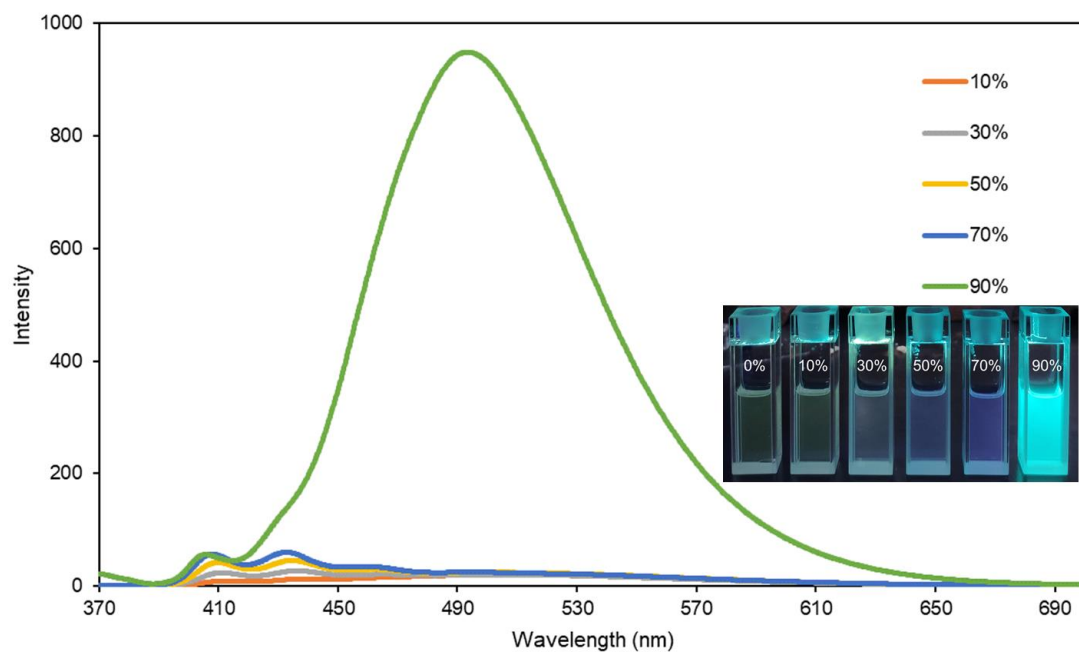

Figure S13. Fluorescence emission spectra ( $\lambda_{\text{ex}} = 360$  nm; slit width: ex = 5 nm, em = 2.5 nm) and photographs upon ( $\lambda_{\text{ex}} = 365$  nm) of ligand **L** in  $\text{CHCl}_3$  with various hexane fractions at 298K ( $c = 1.6 \times 10^{-5}$  M, 2 mL).

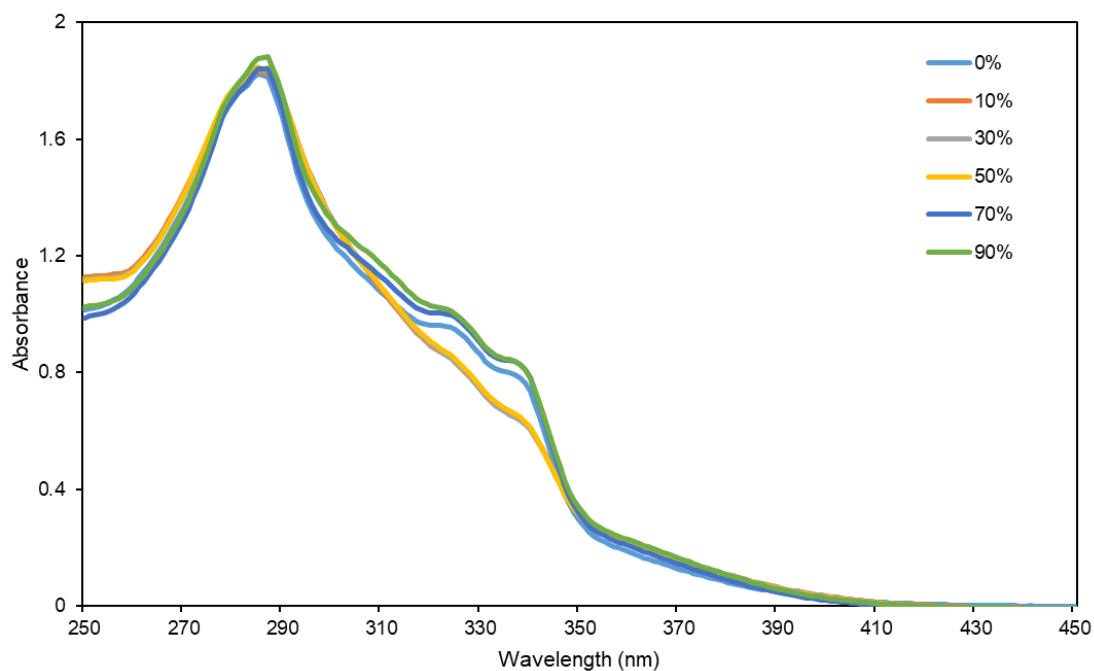

Figure S14. UV-vis spectra of complex **S** in  $\text{CH}_3\text{CN}$  with various  $\text{CH}_3\text{OH}$  fractions at 298K ( $c = 7.04 \times 10^{-6} \text{ M}$ , 2.0 mL).

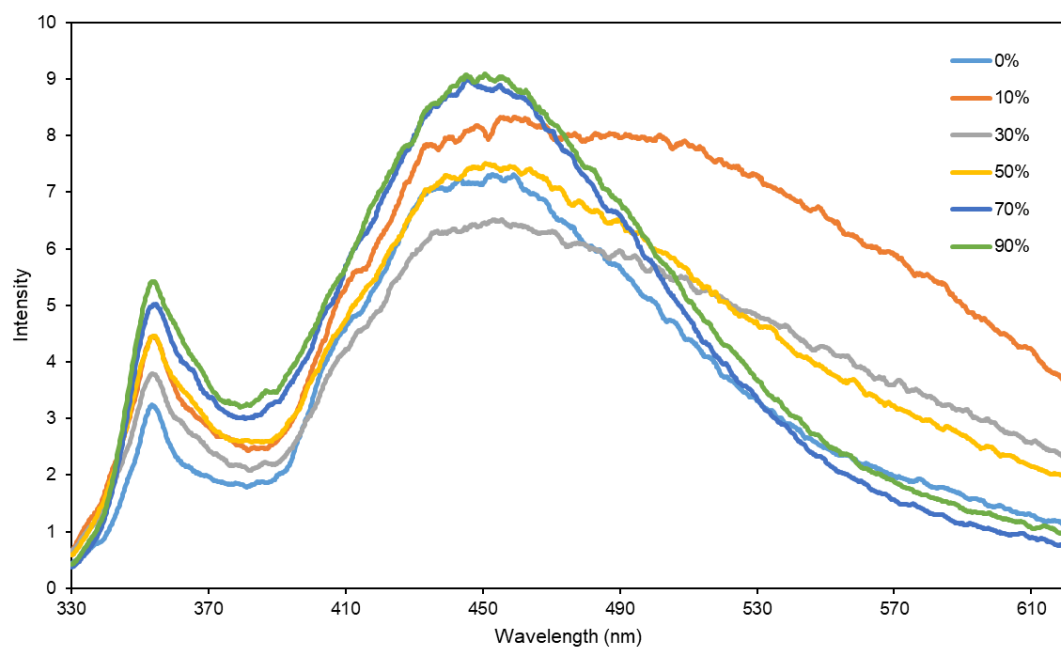

Figure S15. Fluorescence emission spectra ( $\lambda_{\text{ex}} = 320 \text{ nm}$ ; slit width:  $\text{ex} = 5 \text{ nm}$ ,  $\text{em} = 5 \text{ nm}$ ) of complex **S** in  $\text{CH}_3\text{CN}$  with various  $\text{CH}_3\text{OH}$  fractions at 298K ( $c = 7.04 \times 10^{-6} \text{ M}$ , 2.0 mL).

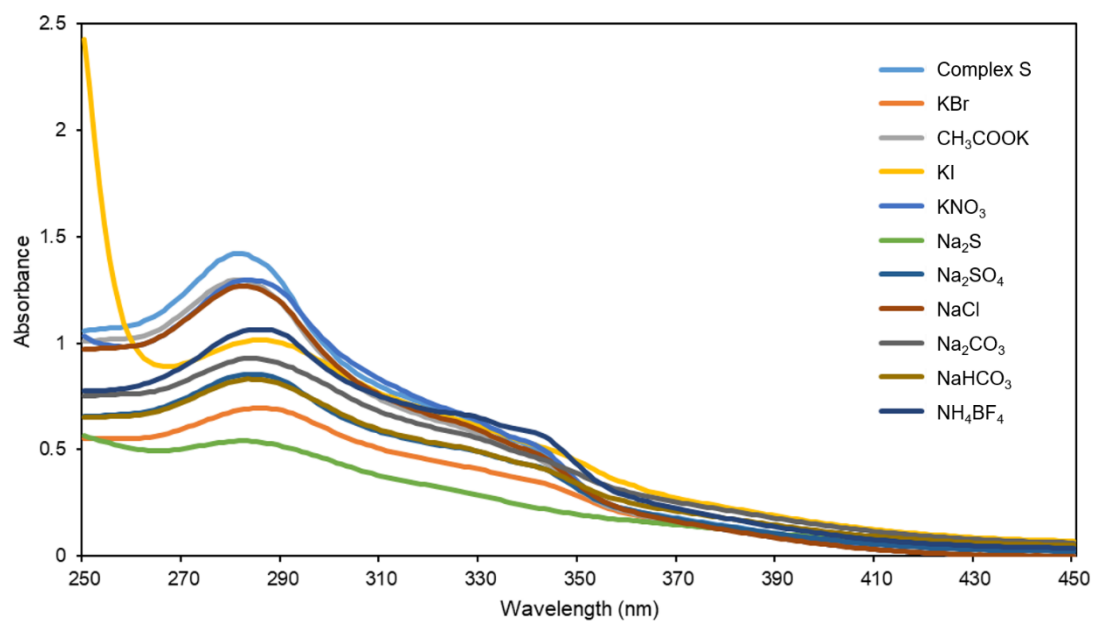

Figure S16. UV-vis spectra of complex **S** in 2.0 mL CH<sub>3</sub>CN/H<sub>2</sub>O mixtures (v/v, 1/9, c = 7.04 × 10<sup>-6</sup> M) after and before addition of 4.0 μmol interfering species.

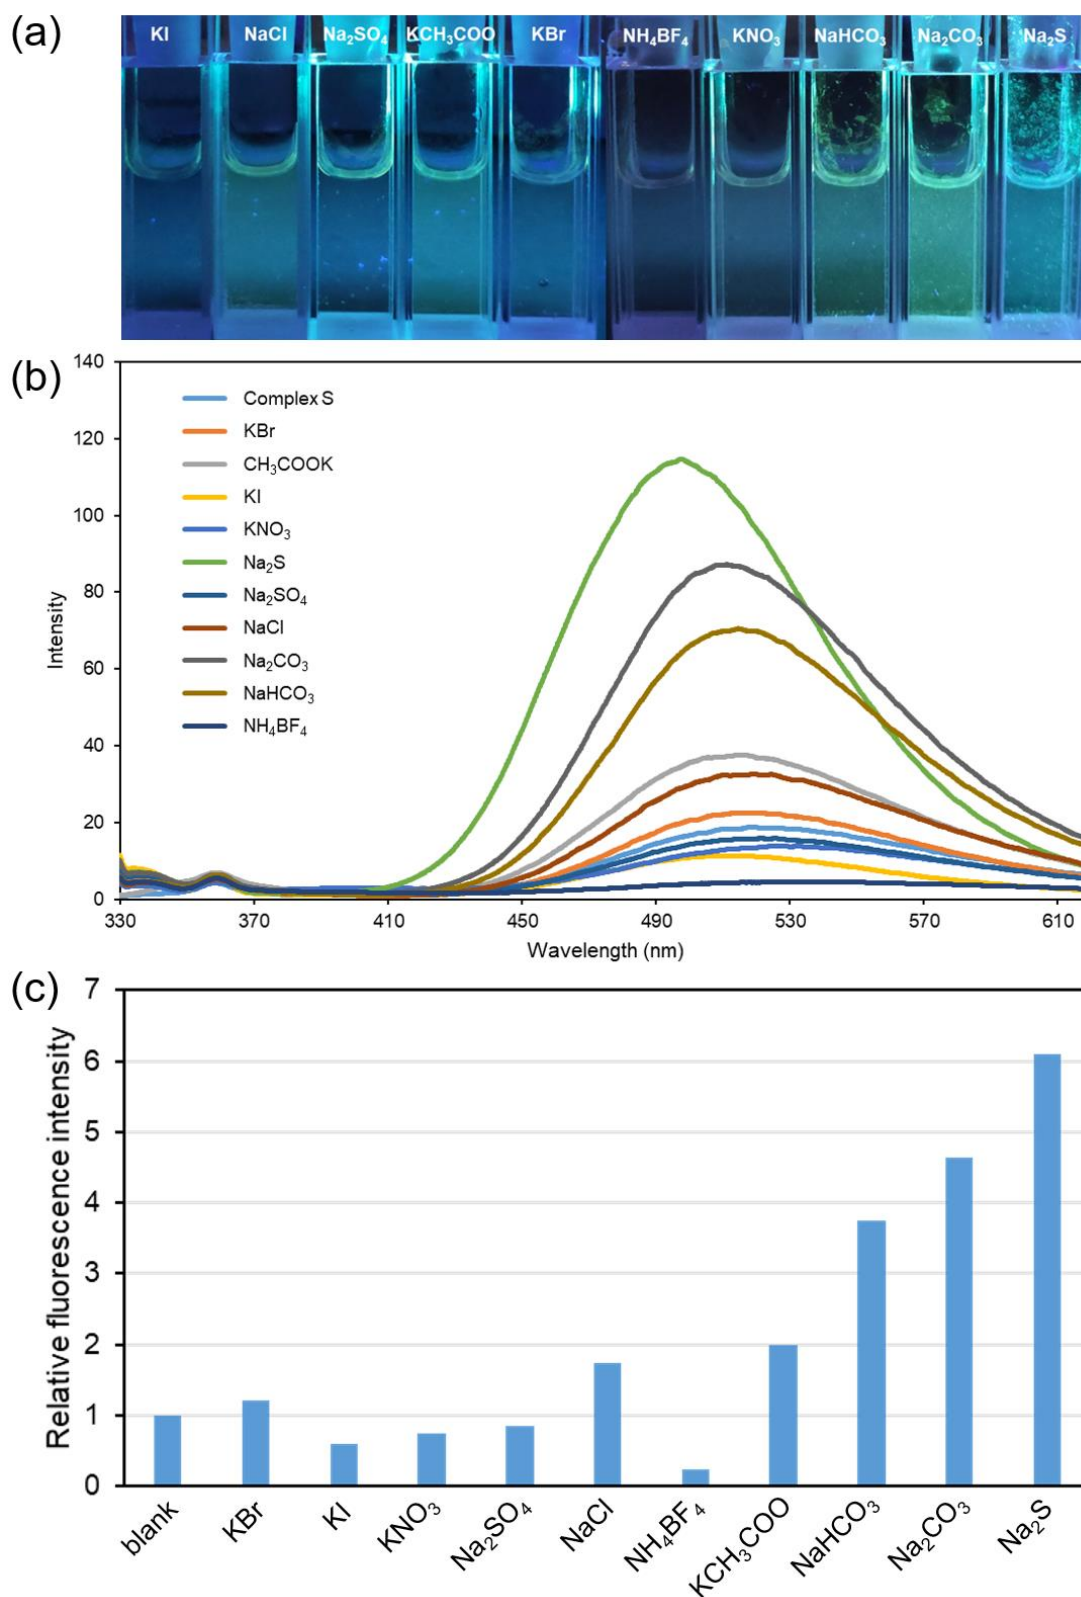

Figure S17. The fluorescence responses of complex **S** in 2.0 mL CH<sub>3</sub>CN/H<sub>2</sub>O at 298 K (v/v, 1/9,  $c = 7.04 \times 10^{-6}$  M): (a) the photographs ( $\lambda_{\text{ex}} = 365$  nm), (b) fluorescence spectra after adding 4.0  $\mu\text{mol}$  interfering species ( $\lambda_{\text{ex}} = 320$  nm; slit width: ex = 5 nm, em = 5 nm) and (c) the relative fluorescence intensity of after and before addition of 4.0  $\mu\text{mol}$  interfering species.

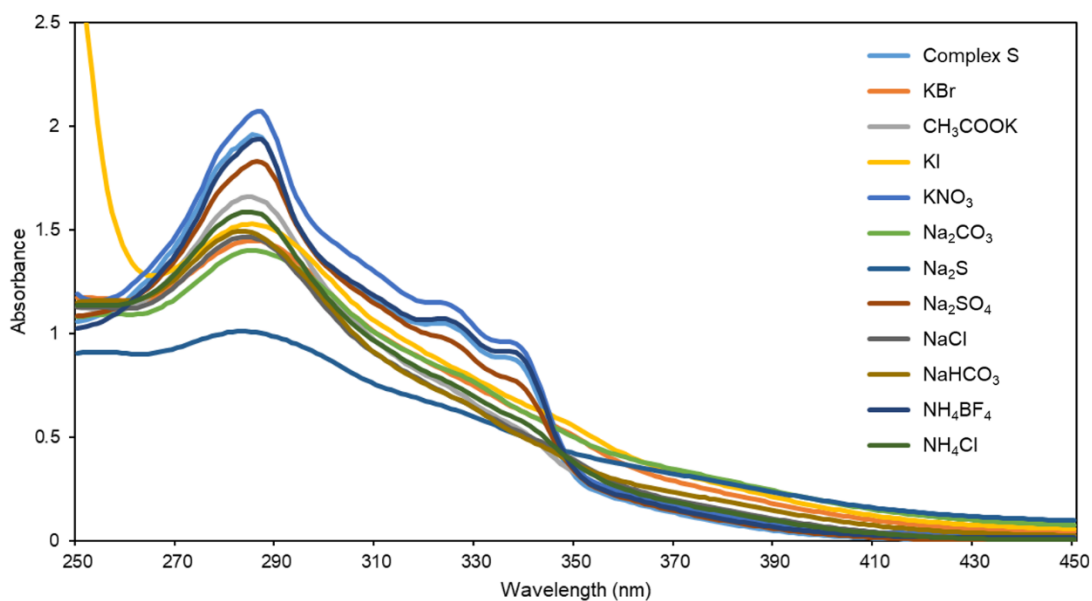

Figure S18. UV-vis spectra of complex **S** in 2.0 mL CH<sub>3</sub>CN/H<sub>2</sub>O mixtures (v/v, 1/1,  $c = 7.04 \times 10^{-6}$  M) after 10 min after and before addition of 4.0  $\mu$ mol interfering species.

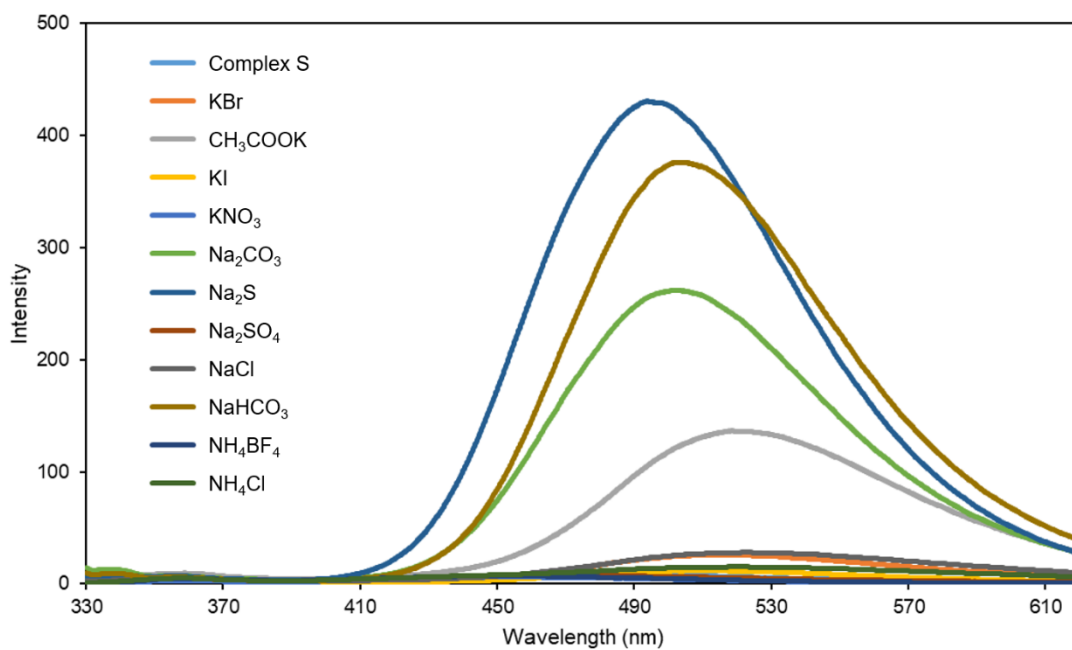

Figure S19. Fluorescence spectra of complex **S** in 2.0 mL CH<sub>3</sub>CN/H<sub>2</sub>O mixtures (v/v, 1/1,  $c = 7.04 \times 10^{-6}$  M) after and before addition of 4.0  $\mu$ mol interfering species. ( $\lambda_{\text{ex}} = 320$  nm; slit width: ex = 5 nm, em = 5 nm)

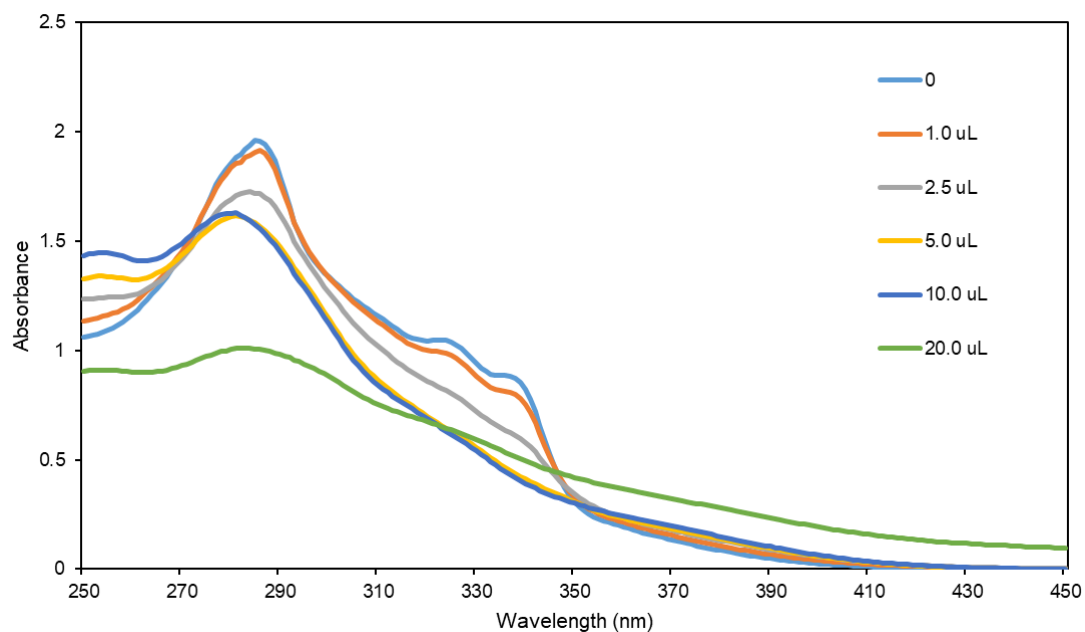

Figure S20. UV-vis spectra of complex **S** in 2.0 mL CH<sub>3</sub>CN/H<sub>2</sub>O mixtures (v/v, 1/1,  $c = 7.04 \times 10^{-6}$  M) after 10 min upon the addition of increasing concentrations of Na<sub>2</sub>S.

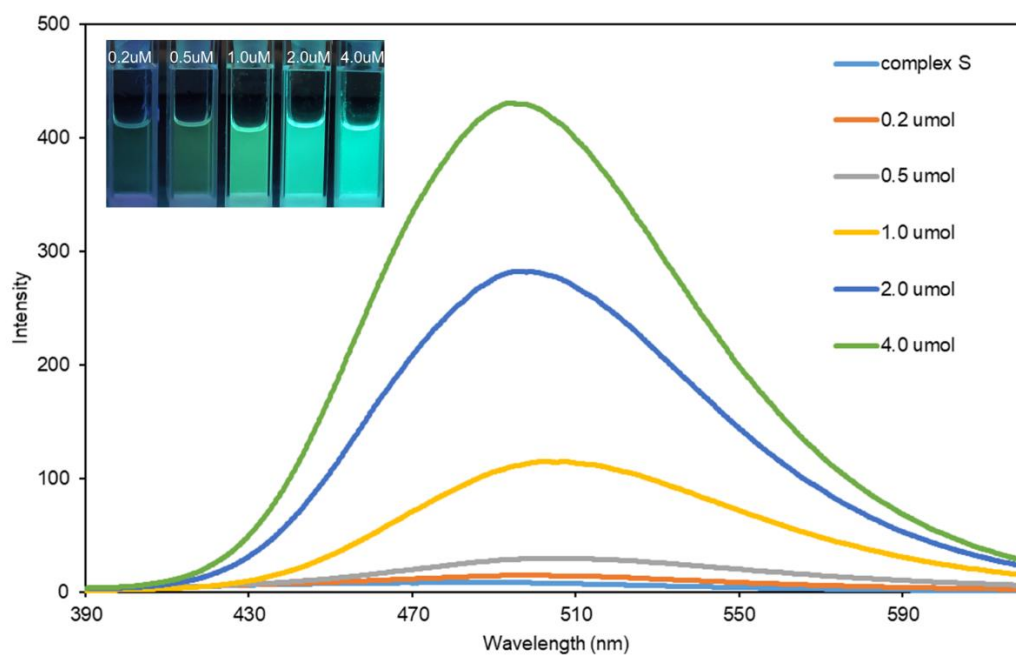

Figure S21. Fluorescence spectra ( $\lambda_{\text{ex}} = 320$  nm; slit width: ex = 5 nm, em = 5 nm) and photographs ( $\lambda_{\text{ex}} = 365$  nm) of complex **S** in 2.0 mL CH<sub>3</sub>CN/H<sub>2</sub>O mixtures (v/v, 1/1,  $c = 7.04 \times 10^{-6}$  M) after 10 min upon the addition of increasing concentrations of Na<sub>2</sub>S.

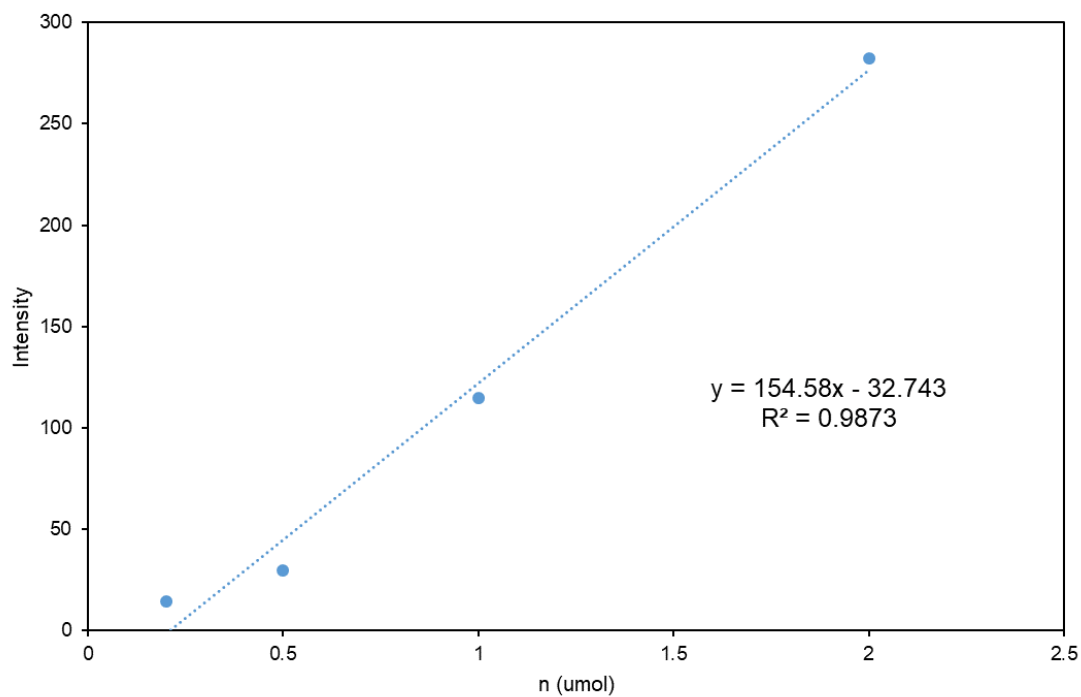

Figure S22. The emission intensities of complex **S** in 2.0 mL CH<sub>3</sub>CN/H<sub>2</sub>O mixtures (v/v, 1/1,  $c = 7.04 \times 10^{-6}$  M) at 494 nm as a function of Na<sub>2</sub>S concentration.

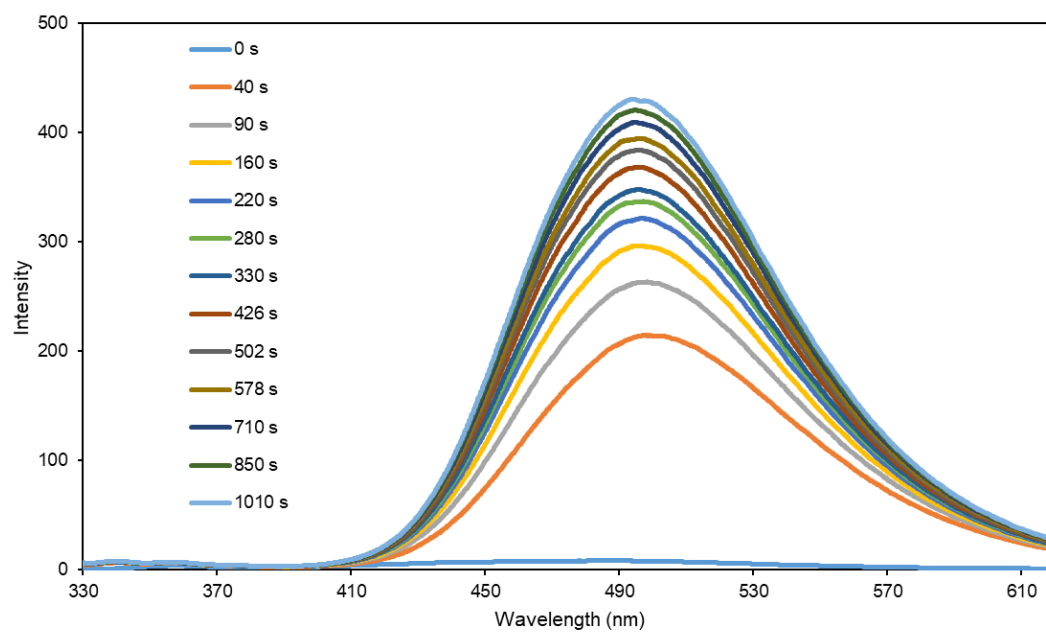

Figure S23. The time dependent fluorescence spectra of complex **S** in 2.0 mL CH<sub>3</sub>CN/H<sub>2</sub>O mixtures (v/v, 1/1,  $c = 7.04 \times 10^{-6}$  M) after addition of 4.0 μmol Na<sub>2</sub>S. ( $\lambda_{\text{ex}} = 320$  nm; slit width: ex = 5 nm, em = 5 nm)

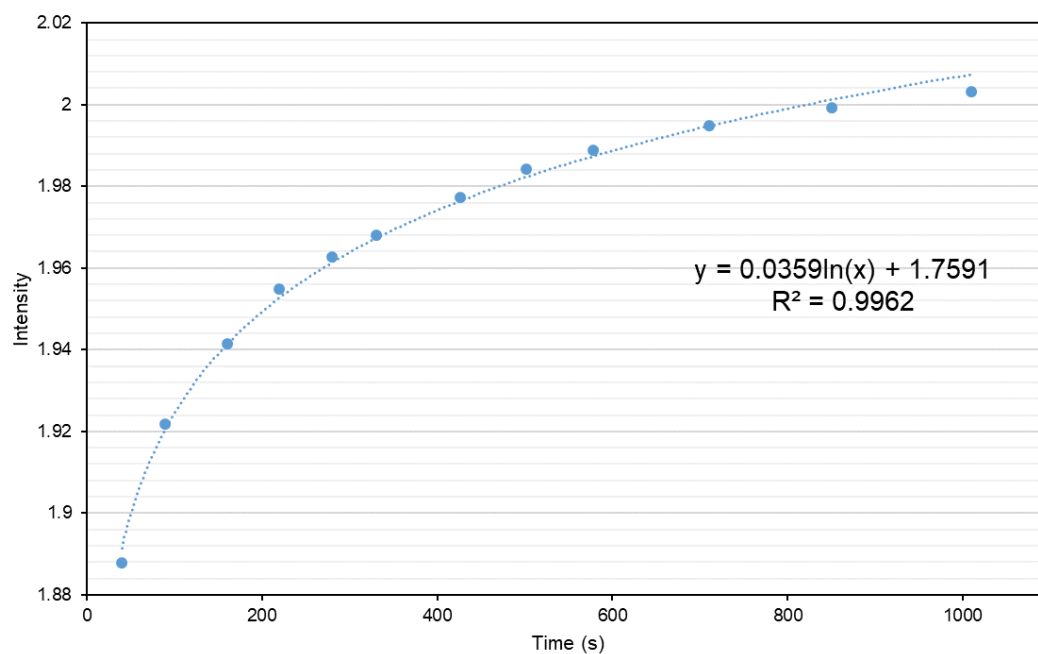

Figure S24. The fluorescence intensity at 494 nm of complex **S** in CH<sub>3</sub>CN/H<sub>2</sub>O mixtures (v/v, 1/1,  $c = 7.04 \times 10^{-6}$  M) after addition of 4.0  $\mu$ mol Na<sub>2</sub>S as a function of time.

#### 4. Reference

- S1. a) K. B. Shelimov, D. E. Clemmer, R. R. Hudgins, M. F. Jarrold, *J. Am. Chem. Soc.*, **1997**, *119*, 2240-2248; b) S. J. Valentine, J. G. Anderson, A. D. Ellington, D. E. Clemmer, *J. Phys. Chem. B*, **1997**, *101*, 3891-3900; c) I. Campuzano, M. F. Bush, C. V. Robinson, C. Beaumont, K. Richardson, H. Kim, H. I. Kim, *Anal. Chem.*, **2012**, *84*, 1026-1033; d) M. F. Bush, I. D. G. Campuzano, C. V. Robinson, *Anal. Chem.*, **2012**, *84*, 7124-7130; e) R. Salbo, M. F. Bush, H. Naver, I. Campuzano, C. V. Robinson, I. Pettersson, T. J. D. Jørgensen, K. F. Haselmann, *Rapid Comm. Mass Spectrom.*, **2012**, *26*, 1181-1193.
- S2. W. Yang, G. Chang, H. Wang, T. Hu, Z. ao, K. Alfooty, S. Xiang, B. Chen, *Eur. J. Inorg. Chem.*, **2016**, *2016*, 4470-4475.
